# Supplementary material for: Acetylcholine Mediates Dynamic Switching Between Information Coding Schemes in Neuronal Networks
Source: Front Syst Neurosci. 2019 Nov 12;13:64. doi: 10.3389/fnsys.2019.00064 (PMC6861375; doi:10.3389/fnsys.2019.00064)
Supplement: Supplementary file 1 [file Table_1.DOCX]

Supplementary Material

# Supplementary Figures and Tables

## Supplementary Figures


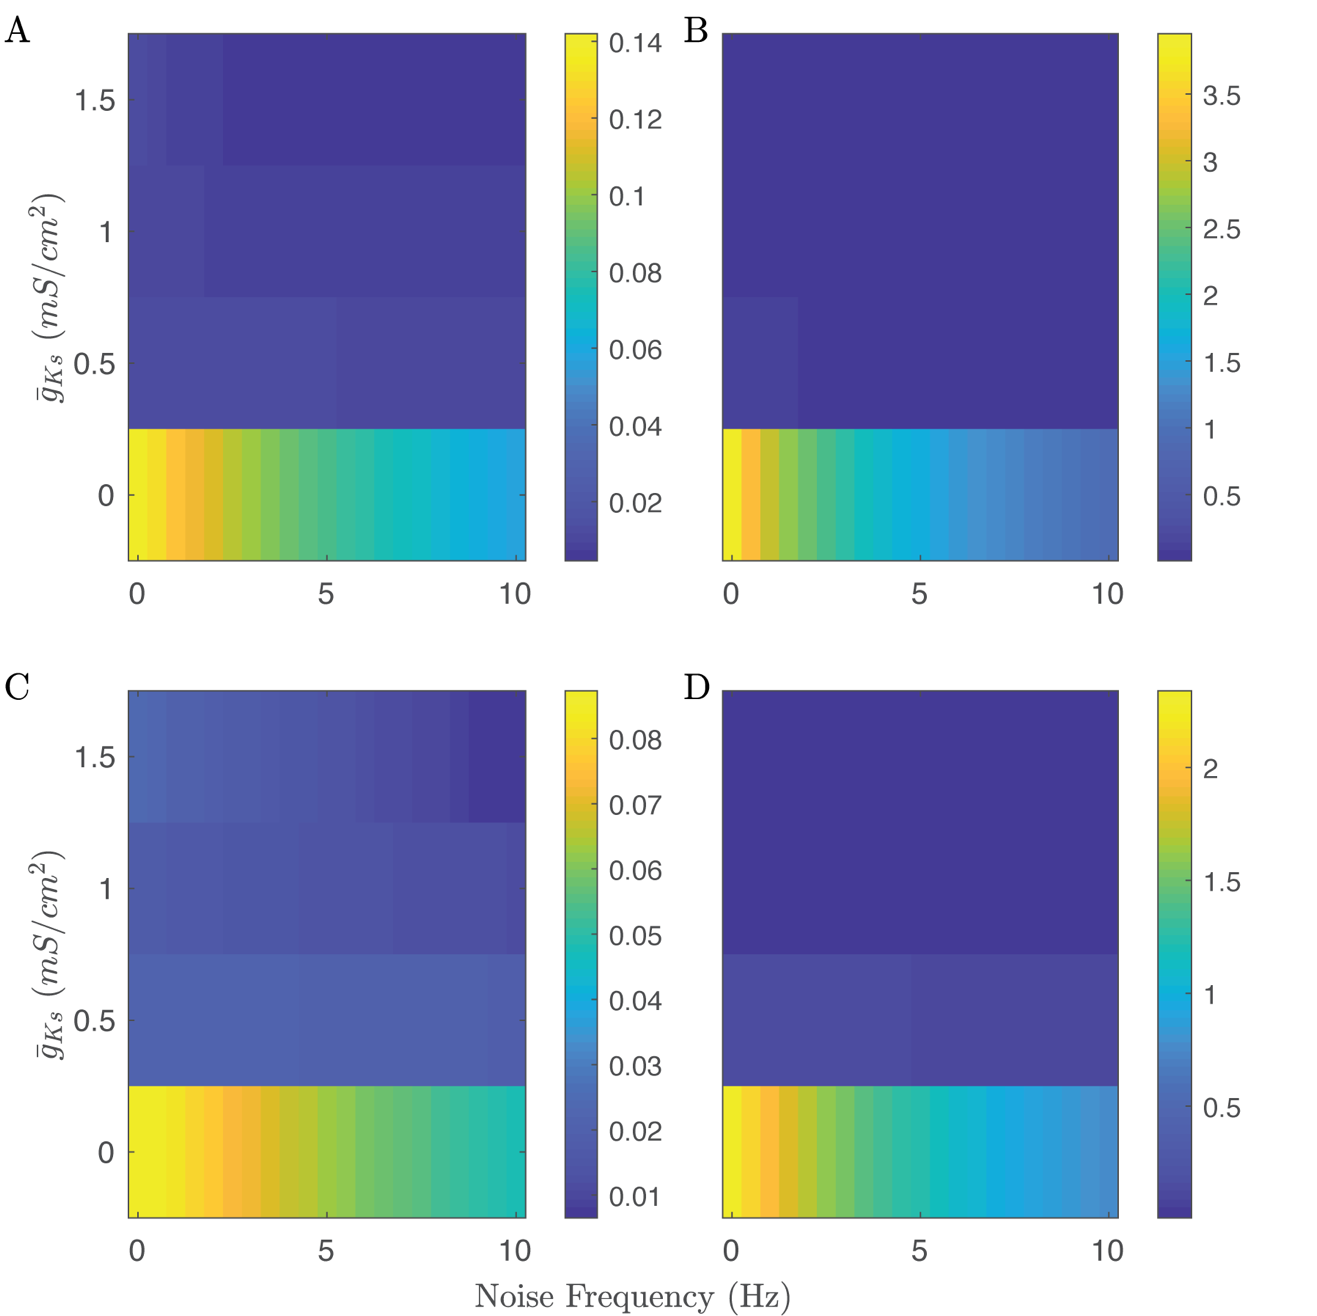


**Supplementary Figure 1.** Network frequency similarity scores for increasing noise with external input patterns (A&B) and on different networks (C&D). Low networks rate code better than high networks over all noise levels (A) NSFreq and (B) are shown for input patterns. (C) NSFreq and (D) for varying network structure.

**
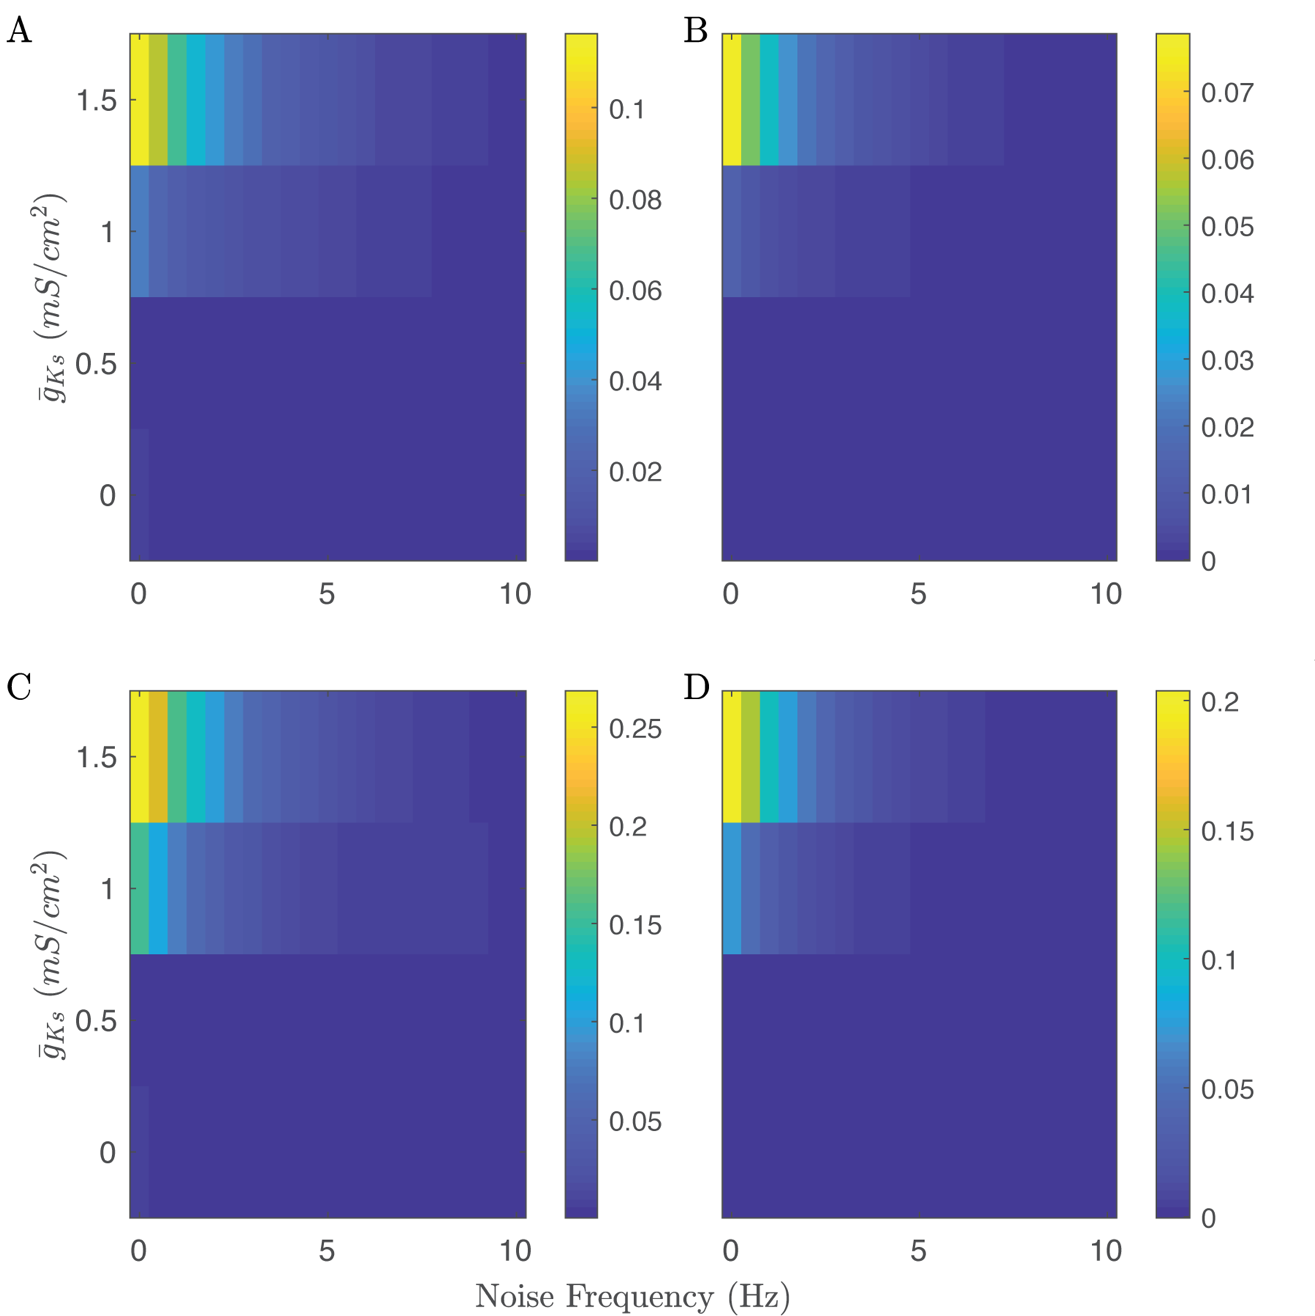
**

**Supplementary Figure 2.** Network phase similarity scores for increasing noise for external input patterns (A&B) and different network structures (C&D). High networks phase code better than low networks, but phase coding overall is highly noise dependent. (A) NSPhase and (B) for input pattens. (A) NSPhase and (B) for for network structures.

**
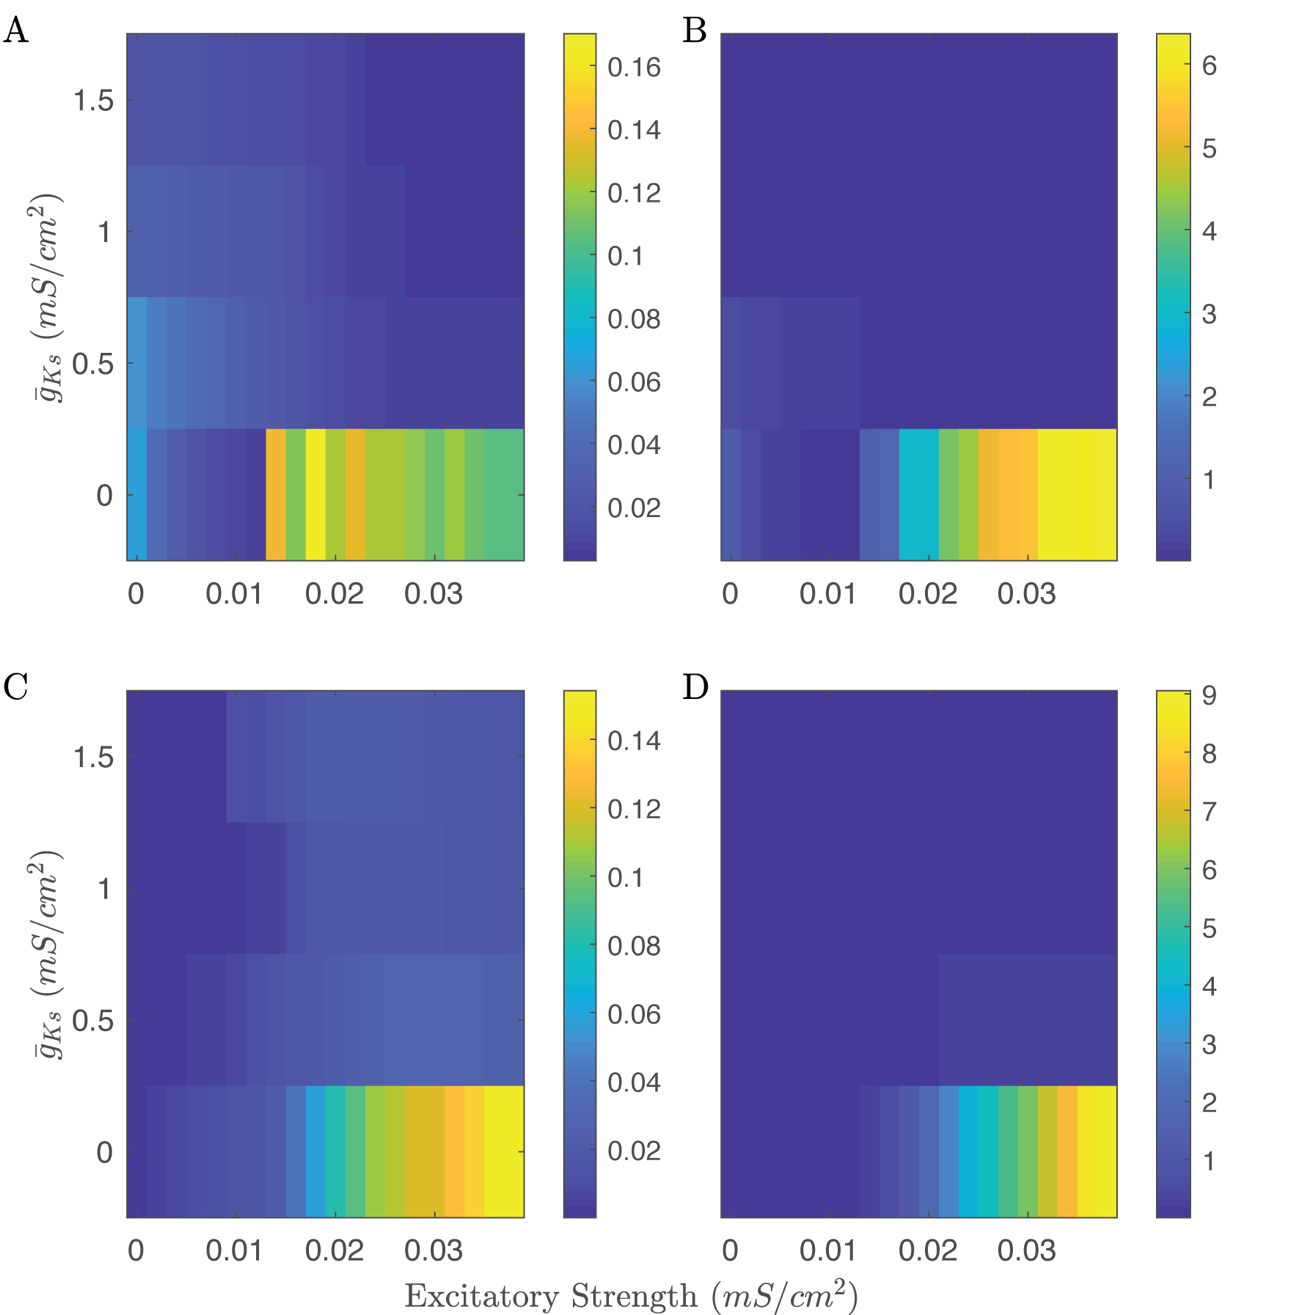
**

**Supplementary Figure 3.** Network frequency similarity scores for increasing excitatory coupling with external inputs (A&B) and network structures (C&D). Low networks rate code better than high networks with increasing performance as coupling increases. (A) NSFreq and (B) for input patterns. (A) NSFreq and (B) for network structures.

**
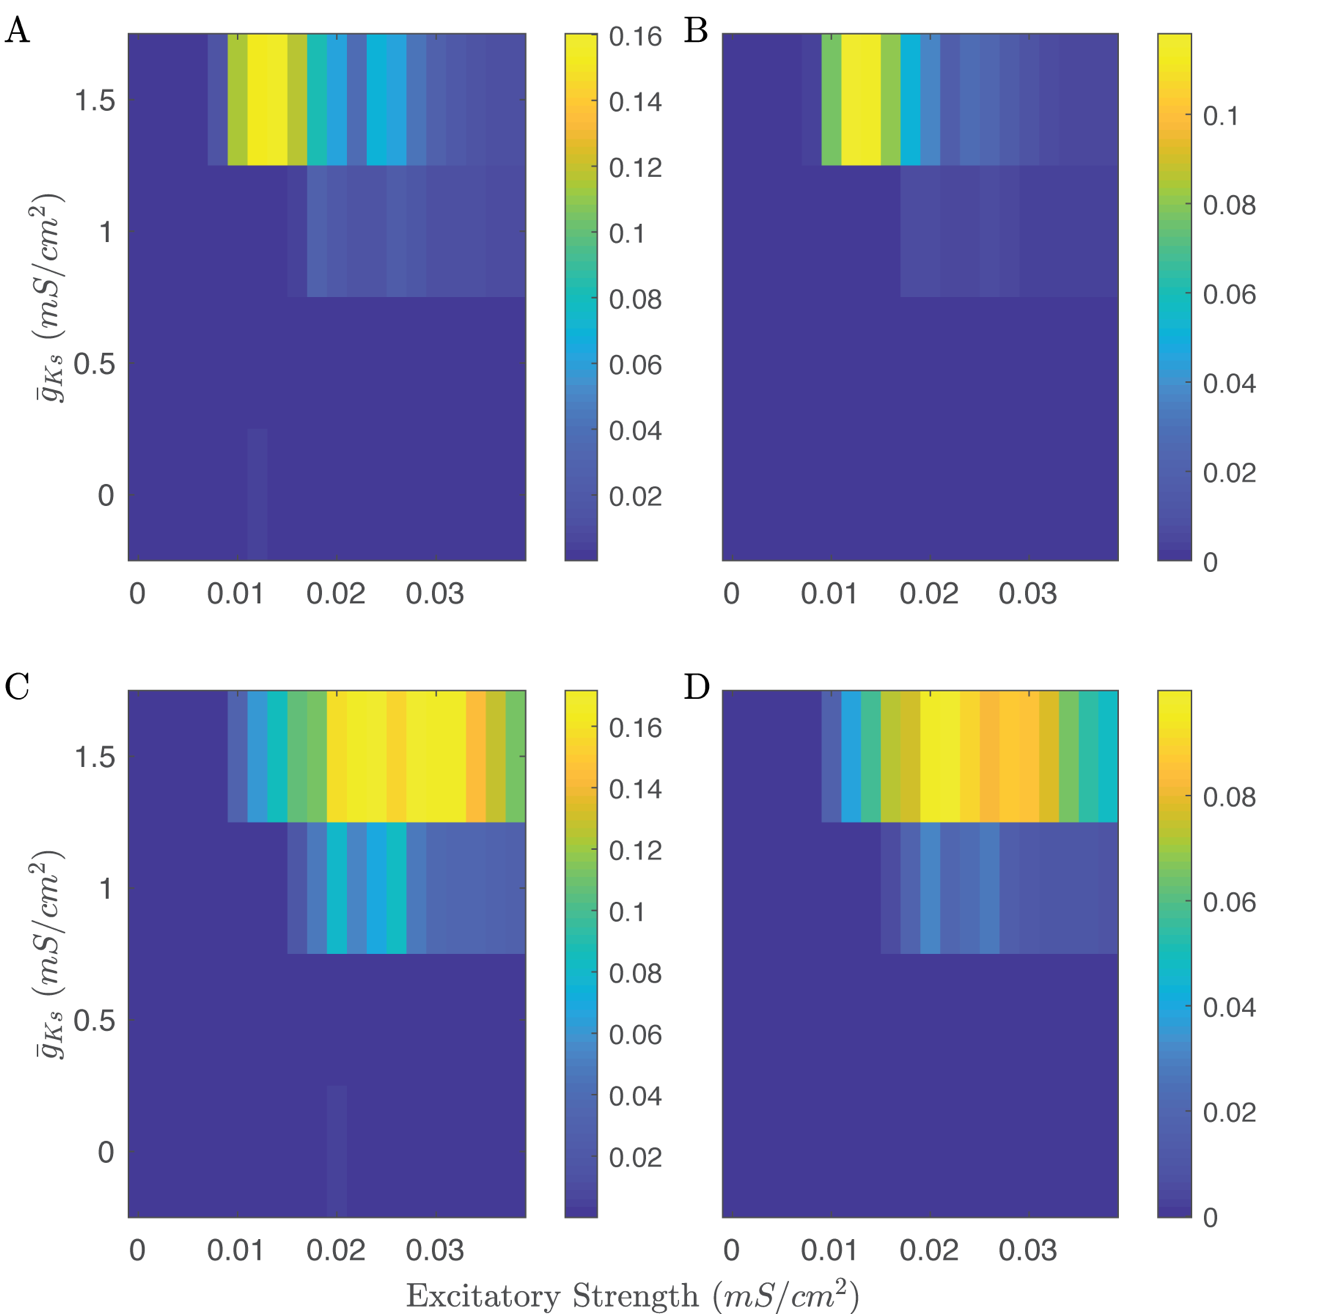
**

**Supplementary Figure 4.** Network phase similarity scores for increasing excitatory coupling with varying inputs (A&B) and network structures (C&D). High networks phase code better than high networks once coupling reaches a sufficient level and decreases for vary strong coupling. (A) NSPhase and (B) for input patterns. (A) NSPhase and (B) for network structures.
